# Supplementary material for: Single-Arm, Multicenter Phase I/II Clinical Trial for the Treatment of Envenomings by Massive Africanized Honey Bee Stings Using the Unique Apilic Antivenom
Source: Front Immunol. 2021 Mar 23;12:653151. doi: 10.3389/fimmu.2021.653151 (PMC8025786; doi:10.3389/fimmu.2021.653151)
Supplement: Supplementary file 4 [file DataSheet_4.xlsx]

## Sheet: Before antivenom
	Table 1 - General aspects before specific treatment
		1	2	3	4	5	6	7	8	9	10	11	12	13	14	15	16	17	18	19	20
		00101	00102	00103	00105	00106	00107	00108	00109	00110	00111	00112	00113	00114	00115	00116	00117	00301	00302	00303	00304
	Age	32	32	38	23	30	54	52	49	46	30	50	42	36	61	34	46	61	77	22	66
	Body mass index	21	26.1	29.7	27.7	25.5	29.8	25.1	24	19.3	24.8	25.8	28.7	27.8	26.5	23.5	29.7		24.8	32.8	29.8
	Number of stings	400	40	10	16	10	150	500	55	165	10	30	50	500	100	180	2000	20	150	7	50
	Time from sting to treatment	3	10	0	0	2	1	19	2	2	4	4	4	1	1	1	6	0	0	1	0
	Hemodynamic disorders	0	0	0	0	0	0	0	0	0	0	0	0	0	0	0	0	0	yes	0	0
	Respiratory disorders	0	0	0	0	0	0	0	0	0	yes	0	0	0	0	0	0	0	0	0	0
	Neurological disorders	0	0	0	0	0	0	0	0	0	yes	0	0	0	0	0	0	0	0	0	0
	Acute kidney failure	0	0	0	0	0	0	0	0	0	0	0	0	0	0	0	0	0	0	0	0
	Creatine kinase (CK)	364	88	708	172	40	189	53	823	545	52	354	1136	11504	271	424	1222	188	66	196	66
	Alanine amino transferase (ALT)	140	34	40	56	54	31	97	43	37	20	33	48	60	43	38	404	11	12	15	14
	Creatinine	0.8	1	1.3	1	1	0.9	1	2.4	0.7	0.6	0.7	0.9	1	1.1	0.8	1	1.25	0.82	0.83	0.78
	C-reactive protein (CRP)	0.6	0.5	0.9	0.5	2	0.5	5.3	1.4	0.6	1.4	0.5	3	3.6	1.1	3.5	0.5	3.6	3.1	6.5	2.5
	Fibrinogen	259	199	358	310	376	414	543	360		231	286	373	401	243	394		306	407	335	419
	Leukocytosis	14.7	9.4	7.2	5.3	11.2	19.5	7.8	17.4	15.2	10.2	5.6	13.3	17.1	9.4	10.5	11.2	10.1	17.6	9.3	10.3
	Thrombocytopenia (platelets)	347	196	277	252	638	410	186	158	211	312	267	320	213	213	269	190	297	271	240	302
		Colors: White – mild cases; Yellow – moderate cases; Orange – severe case.
	Table 2 - General aspects before specific treatment including AHB Score
		1	2	3	4	5	6	7	8	9	10	11	12	13	14	15	16	17	18	19	20
		00101	00102	00103	00105	00106	00107	00108	00109	00110	00111	00112	00113	00114	00115	00116	00117	00301	00302	00303	00304
	Age	0	0	0	0	0	0	0	0	0	0	0	0	0	1	0	0	1	1	0	1
	Body mass index	0	0	0	0	0	0	0	0	0	0	0	0	0	0	0	0	0	0	1	0
	Number of stings	2	1	1	1	1	1	2	1	1	1	1	1	2	1	1	3	1	1	1	1
	Time from sting to treatment	1	1	0	0	1	1	1	1	1	1	1	1	1	1	1	1	0	0	1	0
	Hemodynamic disorders	0	0	0	0	0	0	0	0	0	0	0	0	0	0	0	0	0	1	0	0
	Respiratory disorders	0	0	0	0	0	0	0	0	0	1	0	0	0	0	0	0	0	0	0	0
	Neurological disorders	0	0	0	0	0	0	0	0	0	1	0	0	0	0	0	0	0	0	0	0
	Acute kidney failure	0	0	0	0	0	0	0	0	0	0	0	0	0	0	0	0	0	0	0	0
	Creatine kinase (CK)	1	0	1	1	1	1	1	1	1	1	1	1	1	1	1	1	1	0	1	0
	Alanine amino transferase (ALT)	1	0	0	0	1	0	1	0	0	0	0	0	0	0	0	1	0	0	0	0
	Creatinine	0	0	0	0	0	0	0	1	0	0	0	0	0	0	0	0	0	0	0	0
	C-reactive protein (CRP)	0	0	0	0	1	0	1	1	0	1	0	1	1	1	1	0	1	1	1	1
	Fibrinogen	0	1	0	0	0	1	1	0	0	0	0	0	1	0	1	0	0	1	0	1
	Leukocytosis	1	0	0	0	1	1	0	1	1	0	0	0	0	0	0	1	0	1	0	0
	Thrombocytopenia (platelets)	0	0	0	0	1	0	0	0	0	0	0	0	0	0	0	0	0	0	0	0
	AHB SCORE	6	3	2	2	7	5	7	6	4	6	3	4	6	5	5	7	4	6	5	4
		Colors: White – mild cases; Yellow – moderate cases; Orange – severe case.
	Table 3 - Before treatment with clinical and laboratory aspects
		1	2	3	4	5	6	7	8	9	10	11	12	13	14	15	16	17	18	19	20
		00101	00102	00103	00105	00106	00107	00108	00109	00110	00111	00112	00113	00114	00115	00116	00117	00301	00302	00303	00304
	Hemodynamic disorders	0	0	0	0	0	0	0	0	0	0	0	0	0	0	0	0	0	yes	0	0
	Respiratory disorders	0	0	0	0	0	0	0	0	0	yes	0	0	0	0	0	0	0	0	0	0
	Neurological disorders	0	0	0	0	0	0	0	0	0	yes	0	0	0	0	0	0	0	0	0	0
	Acute kidney failure	0	0	0	0	0	0	0	0	0	0	0	0	0	0	0	0	0	0	0	0
	Creatine kinase (CK)	364	88	708	172	40	189	53	823	545	52	354	1136	11504	271	424	1222	188	66	196	66
	Alanine amino transferase (ALT)	140	34	40	56	54	31	97	43	37	20	33	48	60	43	38	404	11	12	15	14
	Creatinine	0.8	1	1.3	1	1	0.9	1	2.4	0.7	0.6	0.7	0.9	1	1.1	0.8	1	1.25	0.82	0.83	0.78
	C-reactive protein (CRP)	0.6	0.5	0.9	0.5	2	0.5	5.3	1.4	0.6	1.4	0.5	3	3.6	1.1	3.5	0.5	3.6	3.1	6.5	2.5
	Fibrinogen	259	199	358	310	376	414	543	360		231	286	373	401	243	394		306	407	335	419
	Leukocytosis	14.7	9.4	7.2	5.3	11.2	19.5	7.8	17.4	15.2	10.2	5.6	13.3	17.1	9.4	10.5	11.2	10.1	17.6	9.3	10.3
	Thrombocytopenia (platelets)	347	196	277	252	638	410	186	158	211	312	267	320	213	213	269	190	297	271	240	302
		Colors: White – mild cases; Yellow – moderate cases; Orange – severe case.
	Table 4 - Before treatment with clinical and laboratory aspects including AHB Score
		1	2	3	4	5	6	7	8	9	10	11	12	13	14	15	16	17	18	19	20
		00101	00102	00103	00105	00106	00107	00108	00109	00110	00111	00112	00113	00114	00115	00116	00117	00301	00302	00303	00304
	Hemodynamic disorders	0	0	0	0	0	0	0	0	0	0	0	0	0	0	0	0	0	1	0	0
	Respiratory disorders	0	0	0	0	0	0	0	0	0	1	0	0	0	0	0	0	0	0	0	0
	Neurological disorders	0	0	0	0	0	0	0	0	0	1	0	0	0	0	0	0	0	0	0	0
	Acute kidney failure	0	0	0	0	0	0	0	0	0	0	0	0	0	0	0	0	0	0	0	0
	Creatine kinase (CK)	1	0	1	1	1	1	1	1	1	1	1	1	1	1	1	1	1	0	1	0
	Alanine amino transferase (ALT)	1	0	0	0	1	0	1	0	0	0	0	0	0	0	0	1	0	0	0	0
	Creatinine	0	0	0	0	0	0	0	1	0	0	0	0	0	0	0	0	0	0	0	0
	C-reactive protein (CRP)	0	0	0	0	1	0	1	1	0	1	0	1	1	1	1	0	1	1	1	1
	Fibrinogen	0	1	0	0	0	1	1	0		0	0	0	1	0	1		0	1	0	1
	Leukocytosis	1	0	0	0	1	1	0	1	1	0	0	0	0	0	0	1	0	1	0	0
	Thrombocytopenia (platelets)	0	0	0	0	1	0	0	0	0	0	0	0	0	0	0	0	0	0	0	0
	AHB SCORE	3	1	1	1	5	3	4	4	2	4	1	2	3	2	3	3	2	4	2	2
		Colors: White – mild cases; Yellow – moderate cases; Orange – severe case.
	Table 5 - Before treatment only with laboratory aspects
		1	2	3	4	5	6	7	8	9	10	11	12	13	14	15	16	17	18	19	20
		00101	00102	00103	00105	00106	00107	00108	00109	00110	00111	00112	00113	00114	00115	00116	00117	00301	00302	00303	00304
	Creatine kinase (CK)	364	88	708	172	40	189	53	823	545	52	354	1136	11504	271	424	1222	188	66	196	66
	Alanine amino transferase (ALT)	140	34	40	56	54	31	97	43	37	20	33	48	60	43	38	404	11	12	15	14
	Creatinine	0.8	1	1.3	1	1	0.9	1	2.4	0.7	0.6	0.7	0.9	1	1.1	0.8	1	1.25	0.82	0.83	0.78
	C-reactive protein (CRP)	0.6	0.5	0.9	0.5	2	0.5	5.3	1.4	0.6	1.4	0.5	3	3.6	1.1	3.5	0.5	3.6	3.1	6.5	2.5
	Fibrinogen	259	199	358	310	376	414	543	360		231	286	373	401	243	394		306	407	335	419
	Leukocytosis	14.7	9.4	7.2	5.3	11.2	19.5	7.8	17.4	15.2	10.2	5.6	13.3	17.1	9.4	10.5	11.2	10.1	17.6	9.3	10.3
	Thrombocytopenia (platelets)	347	196	277	252	638	410	186	158	211	312	267	320	213	213	269	190	297	271	240	302
		Colors: White – mild cases; Yellow – moderate cases; Orange – severe case.
	Table 6 - Before treatment only with laboratory aspects including AHB Score
		1	2	3	4	5	6	7	8	9	10	11	12	13	14	15	16	17	18	19	20
		00101	00102	00103	00105	00106	00107	00108	00109	00110	00111	00112	00113	00114	00115	00116	00117	00301	00302	00303	00304
	Creatine kinase (CK)	1	0	1	1	1	1	1	1	1	1	1	1	1	1	1	1	1	0	1	0
	Alanine amino transferase (ALT)	1	0	0	0	1	0	1	0	0	0	0	0	0	0	0	1	0	0	0	0
	Creatinine	0	0	0	0	0	0	0	1	0	0	0	0	0	0	0	0	0	0	0	0
	C-reactive protein (CRP)	0	0	0	0	1	0	1	1	0	1	0	1	1	1	1	0	1	1	1	1
	Fibrinogen	0	1	0	0	0	1	1	0		0	0	0	1	0	1		0	1	0	1
	Leukocytosis	1	0	0	0	1	1	0	1	1	0	0	0	0	0	0	1	0	1	0	0
	Thrombocytopenia (platelets)	0	0	0	0	1	0	0	0	0	0	0	0	0	0	0	0	0	0	0	0
	AHB SCORE	3	1	1	1	5	3	4	4	2	2	1	2	3	2	3	3	2	3	2	2
		Colors: White – mild cases; Yellow – moderate cases; Orange – severe case.

## Sheet: Discharge
	Table 7 - Discharge after treatment with clinical and laboratory aspects
		1	2	3	4	5	6	7	8	9	10	11	12	13	14	15	16	17	18	19	20
		00101	00102	00103	00105	00106	00107	00108	00109	00110	00111	00112	00113	00114	00115	00116	00117	00301	00302	00303	00304
	Hemodynamic disorders	0	0	0	0	0	0	0	0	0	0	0	0	0	0	0	0	0	0	0	0
	Respiratory disorders	0	0	0	0	0	0	0	0	0	0	0	0	0	0	0	0	0	0	0	0
	Neurological disorders	0	0	0	0	0	0	0	0	0	0	0	0	0	0	0	0	0	0	0	0
	Acute kidney failure	0	0	0	0	0	0	0	0	0	0	0	0	0	0	0	0	0	0	0	0
	Creatine kinase (CK)			520	118	23	74	163	1153		28	151	273	7541	240		544	109	38	114	66
	Alanine amino transferase (ALT)			35	58	34	24	84	59		26		111	69	50		277	12	12	13
	Creatinine			0.9	1	0.7	0.8	1	1.1		0.6	0.7	0.8	1	1.1		1.1	1.18	0.9	0.87
	C-reactive protein (CRP)			1.2	0.5	0.8	2.1	7.6	1.1		1.6	0.5	0.5		0.5		0.5	5.4	3.4	4.7	2.5
	Fibrinogen			342	323	299	492	670	506		313	291	326	401	262			285	335	360	401
	Leukocytosis			0.7	6.5		8.4	10.3	7.9		9	6.4	6.9	7.7	6.4			6.9	17.53	8.9
	Thrombocytopenia (platelets)			201	284		408	197	123		342	299	310	206	176			298	297	219
		Colors: White – mild cases; Yellow – moderate cases; Orange – severe case.
	Table 8 - Discharge after treatment with clinical and laboratory aspects including AHB Score
		1	2	3	4	5	6	7	8	9	10	11	12	13	14	15	16	17	18	19	20
		00101	00102	00103	00105	00106	00107	00108	00109	00110	00111	00112	00113	00114	00115	00116	00117	00301	00302	00303	00304
	Hemodynamic disorders	0	0	0	0	0	0	0	0	0	0	0	0	0	0	0	0	0	0	0	0
	Respiratory disorders	0	0	0	0	0	0	0	0	0	0	0	0	0	0	0	0	0	0	0	0
	Neurological disorders	0	0	0	0	0	0	0	0	0	0	0	0	0	0	0	0	0	0	0	0
	Acute kidney failure	0	0	0	0	0	0	0	0	0	0	0	0	0	0	0	0	0	0	0	0
	Creatine kinase (CK)			1	0	0	0	0	1		0	0	1	1	1		1	0	0	0	0
	Alanine amino transferase (ALT)			0	0	0	0	1	0		0		1	0	0		1	0	0	0
	Creatinine			0	0	0	0	0	0		0	0	0	0	0		0	0	0	0
	C-reactive protein (CRP)			1	0	0	1	1	1		1	0	0		0		0	1	1	1	1
	Fibrinogen			0	0	0	1	1	1		0	0	0	1	0			0	0	0	1
	Leukocytosis			0	0		0	0	0		0	0	0	0	0			0	1	0
	Thrombocytopenia (platelets)			0	0		0	0	1		0	0	0	0	0			0	0	0
	SCORE AHB	0	0	2	0	0	2	3	4	0	1	0	2	2	1	0	2	1	2	1	2
		Colors: White – mild cases; Yellow – moderate cases; Orange – severe case.
	Table 9 - Discharge after treatment only with laboratory aspects
		1	2	3	4	5	6	7	8	9	10	11	12	13	14	15	16	17	18	19	20
		00101	00102	00103	00105	00106	00107	00108	00109	00110	00111	00112	00113	00114	00115	00116	00117	00301	00302	00303	00304
	Creatine kinase (CK)			520	118	23	74	163	1153		28	151	273	7541	240		544	109	38	114	66
	Alanine amino transferase (ALT)			35	58	34	24	84	59		26		111	69	50		277	12	12	13
	Creatinine			0.9	1	0.7	0.8	1	1.1		0.6	0.7	0.8	1	1.1		1.1	1.18	0.9	0.87
	C-reactive protein (CRP)			1.2	0.5	0.8	2.1	7.6	1.1		1.6	0.5	0.5		0.5		0.5	5.4	3.4	4.7	2.5
	Fibrinogen			342	323	299	492	670	506		313	291	326	401	262			285	335	360	401
	Leukocytosis			0.7	6.5		8.4	10.3	7.9		9	6.4	6.9	7.7	6.4			6.9	17.53	8.9
	Thrombocytopenia (platelets)			201	284		408	197	123		342	299	310	206	176			298	297	219
		Colors: White – mild cases; Yellow – moderate cases; Orange – severe case.
	Table 10 - Discharge after treatment only with laboratory aspects including AHB Score
		1	2	3	4	5	6	7	8	9	10	11	12	13	14	15	16	17	18	19	20
		00101	00102	00103	00105	00106	00107	00108	00109	00110	00111	00112	00113	00114	00115	00116	00117	00301	00302	00303	00304
	Creatine kinase (CK)			1	0	0	0	0	1		0	0	1	1	1		1	0	0	0	0
	Alanine amino transferase (ALT)			0	0	0	0	1	0		0		1	0	0		1	0	0	0
	Creatinine			0	0	0	0	0	0		0	0	0	0	0		0	0	0	0
	C-reactive protein (CRP)			1	0	0	1	1	1		1	0	0		0		0	1	1	1	1
	Fibrinogen			0	0	0	1	1	1		0	0	0	1	0			0	0	0	1
	Leukocytosis			0	0		0	0	0		0	0	0	0	0			0	1	0
	Thrombocytopenia (platelets)			0	0		0	0	1		0	0	0	0	0			0	0	0
	SCORE AHB			2	0	0	2	3	4	0	1	0	2	2	1	0	2	1	2	1	2
		Colors: White – mild cases; Yellow – moderate cases; Orange – severe case.

## Sheet: 10 days after discharge
	Table 11 - Ten days after treatment with clinical and laboratory aspects
		1	2	3	4	5	6	7	8	9	10	11	12	13	14	15	16	17	18	19	20
		00101	00102	00103	00105	00106	00107	00108	00109	00110	00111	00112	00113	00114	00115	00116	00117	00301	00302	00303	00304
	Hemodynamic disorders	0	0	0	0	0	0	0	0	0	0	0	0	0	0	0	0	0	0	0	0
	Respiratory disorders	0	0	0	0	0	0	0	0	0	0	0	0	0	0	0	0	0	0	0	0
	Neurological disorders	0	0	0	0	0	0	0	0	0	0	0	0	0	0	0	0	0	0	0	0
	Acute kidney failure	0	0	0	0	0	0	0	0	0	0	0	0	0	0	0	0	0	0	0	0
	Creatine kinase (CK)	55	158	253	165	100	196		227	81	43	157	60	59	173	65		378	65	290	19
	Alanine amino transferase (ALT)	52		31	73	23	25		26	38	17		50	75	28	53		16	10	20	14
	Creatinine	0.7	0.9	1	1	0.6	0.7		0.8	0.7	0.7	0.7	0.8	1	0.9	0.9		1.14	1.08	0.92	0.69
	C-reactive protein (CRP)	0.5	0.5	0.9	0.5	0.5	1		0.5	0.8	0.5	0.5	0.6	0.6	0.5	0.5		3.4	3.3	7.1	1.5
	Fibrinogen	279	190	362	326	214	498		359	402	232	348	272		180	230		273	341	335	419
	Leukocytosis	10.7	6	5.7	6	6.5	9.6		7.3	7.9	6.3	6.1	7.1	9.6	4.7	8.2		6.8	11.7	13.62	4
	Thrombocytopenia (platelets)	379	157	218	319	476	408		217	438	270	259	342	277	224	331		291	336	201	209
		Colors: White – mild cases; Yellow – moderate cases; Orange – severe case.
	Table 12 - Ten days after treatment with clinical and laboratory aspects including AHB Score
		1	2	3	4	5	6	7	8	9	10	11	12	13	14	15	16	17	18	19	20
		00101	00102	00103	00105	00106	00107	00108	00109	00110	00111	00112	00113	00114	00115	00116	00117	00301	00302	00303	00304
	Hemodynamic disorders	0	0	0	0	0	0	0	0	0	0	0	0	0	0	0	0	0	0	0	0
	Respiratory disorders	0	0	0	0	0	0	0	0	0	0	0	0	0	0	0	0	0	0	0	0
	Neurological disorders	0	0	0	0	0	0	0	0	0	0	0	0	0	0	0	0	0	0	0	0
	Acute kidney failure	0	0	0	0	0	0	0	0	0	0	0	0	0	0	0	0	0	0	0	0
	Creatine kinase (CK)	0	0	1	0	0	1		1	0	0	0	0	0	1	0		1	0	1	0
	Alanine amino transferase (ALT)	0	0	0	1	0	0		0	0	0		0	1	0	0		0	0	0	0
	Creatinine	0	0	0	0	0	0		0	0	0	0	0	0	0	0		0	0	0	0
	C-reactive protein (CRP)	0	0	0	0	0	0		0	0	0	0	0	0	0	0		1	1	1	1
	Fibrinogen	0	1	0	0	0	1		0	1	0	0	0		0	0		0	0	0	1
	Leukocytosis	0	0	0	0	0	0		0	0	0	0	0	0	0	0		0	1	1	0
	Thrombocytopenia (platelets)	0	0	0	0	1	0		0	0	0	0	0	0	0	0		0	0	0	0
	SCORE AHB	0	1	1	1	1	2	0	1	1	0	0	0	1	1	0	0	2	2	3	2
		Colors: White – mild cases; Yellow – moderate cases; Orange – severe case.
	Table 13 - Ten days after treatment with only laboratory aspects
		1	2	3	4	5	6	7	8	9	10	11	12	13	14	15	16	17	18	19	20
		00101	00102	00103	00105	00106	00107	00108	00109	00110	00111	00112	00113	00114	00115	00116	00117	00301	00302	00303	00304
	Creatine kinase (CK)	55	158	253	165	100	196		227	81	43	157	60	59	173	65		378	65	290	19
	Alanine amino transferase (ALT)	52	32	31	73	23	25		26	38	17		50	75	28	53		16	10	20	14
	Creatinine	0.7	0.9	1	1	0.6	0.7		0.8	0.7	0.7	0.7	0.8	1	0.9	0.9		1.14	1.08	0.92	0.69
	C-reactive protein (CRP)	0.5	0.5	0.9	0.5	0.5	1		0.5	0.8	0.5	0.5	0.6	0.6	0.5	0.5		3.4	3.3	7.1	1.5
	Fibrinogen	279	190	362	326	214	498		359	402	232	348	272		180	230		273	341	335	419
	Leukocytosis	10.7	6	5.7	6	6.5	9.6		7.3	7.9	6.3	6.1	7.1	9.6	4.7	8.2		6.8	11.7	13.62	4
	Thrombocytopenia (platelets)	379	157	218	319	476	408		217	438	270	259	342	277	224	331		291	336	201	209
		Colors: White – mild cases; Yellow – moderate cases; Orange – severe case.
	Table 14 - Ten days after treatment with only laboratory aspects including AHB Score
		1	2	3	4	5	6	7	8	9	10	11	12	13	14	15	16	17	18	19	20
		00101	00102	00103	00105	00106	00107	00108	00109	00110	00111	00112	00113	00114	00115	00116	00117	00301	00302	00303	00304
	Creatine kinase (CK)	0	0	1	0	0	1		1	0	0	0	0	0	1	0		1	0	1	0
	Alanine amino transferase (ALT)	0	0	0	1	0	0		0	0	0		0	1	0	0		0	0	0	0
	Creatinine	0	0	0	0	0	0		0	0	0	0	0	0	0	0		0	0	0	0
	C-reactive protein (CRP)	0	0	0	0	0	0		0	0	0	0	0	0	0	0		1	1	1	1
	Fibrinogen	0	1	0	0	0	1		0	1	0	0	0		0	0		0	0	0	1
	Leukocytosis	0	0	0	0	0	0		0	0	0	0	0	0	0	0		0	1	1	0
	Thrombocytopenia (platelets)	0	0	0	0	1	0		0	0	0	0	0	0	0	0		0	0	0	0
	SCORE AHB			1	1	1	2	0	1	1	0	0	0	1	1	0	0	2	2	3	2
		Colors: White – mild cases; Yellow – moderate cases; Orange – severe case.

## Sheet: 20 days after discharge
	Table 15 - Twenty days after treatment with clinical and laboratory aspects
		1	2	3	4	5	6	7	8	9	10	11	12	13	14	15	16	17	18	19	20
		00101	00102	00103	00105	00106	00107	00108	00109	00110	00111	00112	00113	00114	00115	00116	00117	00301	00302	00303	00304
	Hemodynamic disorders	0	0	0	0	0	0	0	0	0	0	0	0	0	0	0	0	0	0	0	0
	Respiratory disorders	0	0	0	0	0	0	0	0	0	0	0	0	0	0	0	0	0	0	0	0
	Neurological disorders	0	0	0	0	0	0	0	0	0	0	0	0	0	0	0	0	0	0	0	0
	Acute kidney failure	0	0	0	0	0	0	0	0	0	0	0	0	0	0	0	0	0	0	0	0
	Creatine kinase (CK)	74	106	194	131	33	62		119	88	60	248	67	68	138	54		104	161	170	39
	Alanine amino transferase (ALT)	35	24	35	66	21	27		27	37	19		39	27	30	28		20	12	18	15
	Creatinine	0.6	0.9	1	1	0.8	0.7		0.8	0.6	0.6	0.7	0.8	1	1	0.8		0.98	1.35	0.76	0.72
	C-reactive protein (CRP)	0.5	0.5	2.6	0.5	0.5	0.9		0.5	0.5	0.6	0.5	0.8	0.5	0.5	0.5		1.4	4.8	5.8	3.2
	Fibrinogen	306	261	380		287	510		330	363	250	321	307	317	178			266	285	360	393
	Leukocytosis	5.3	8.1	7	5.9	8.2	9		24.5	8.9	5.9	7.9	8.4	3.9	7.6	5.8		5.6	7.61	10.2	3.1
	Thrombocytopenia (platelets)	335	171	239	278	349	387		180	288	300	312	377	233	252	307		234	339	211	283
		Colors: White – mild cases; Yellow – moderate cases; Orange – severe case.
	Table 16 - Twenty days after treatment with clinical and laboratory aspects including AHB Score
		1	2	3	4	5	6	7	8	9	10	11	12	13	14	15	16	17	18	19	20
		00101	00102	00103	00105	00106	00107	00108	00109	00110	00111	00112	00113	00114	00115	00116	00117	00301	00302	00303	00304
	Hemodynamic disorders	0	0	0	0	0	0	0	0	0	0	0	0	0	0	0	0	0	0	0	0
	Respiratory disorders	0	0	0	0	0	0	0	0	0	0	0	0	0	0	0	0	0	0	0	0
	Neurological disorders	0	0	0	0	0	0	0	0	0	0	0	0	0	0	0	0	0	0	0	0
	Acute kidney failure	0	0	0	0	0	0	0	0	0	0	0	0	0	0	0	0	0	0	0	0
	Creatine kinase (CK)	0	0	1	0	0	0		0	0	0	1	0	0	0	0		0	0	0	0
	Alanine amino transferase (ALT)	0	0	0	0	0	0		0	0	0		0	0	0	0		0	0	0	0
	Creatinine	0	0	1	0	0	0		0	0	0	0	0	0	0	0		0	0	0	0
	C-reactive protein (CRP)	0	0	1	0	0	0		0	0	0	0	0	0	0	0		1	1	1	1
	Fibrinogen	0	0	0		0	1		0	0	0	0	0	0	0			0	0	0	0
	Leukocytosis	0	0	0	0	0	0		0	0	0	0	0	0	0	0		0	0	0	0
	Thrombocytopenia (platelets)	0	0	0	0	0	0		0	0	0	0	0	0	0	0		0	0	0	0
	SCORE AHB	0	0	3	0	0	1	0	0	0	0	1	0	0	0	0	0	1	1	1	1
		Colors: White – mild cases; Yellow – moderate cases; Orange – severe case.
	Table 17 - Twenty days after treatment with only laboratory aspects
		1	2	3	4	5	6	7	8	9	10	11	12	13	14	15	16	17	18	19	20
		00101	00102	00103	00105	00106	00107	00108	00109	00110	00111	00112	00113	00114	00115	00116	00117	00301	00302	00303	00304
	Creatine kinase (CK)	74	106	194	131	33	62		119	88	60	248	67	68	138	54		104	161	170	39
	Alanine amino transferase (ALT)	35	24	35	66	21	27		27	37	19		39	27	30	28		20	12	18	15
	Creatinine	0.6	0.9	1	1	0.8	0.7		0.8	0.6	0.6	0.7	0.8	1	1	0.8		0.98	1.35	0.76	0.72
	C-reactive protein (CRP)	0.5	0.5	2.6	0.5	0.5	0.9		0.5	0.5	0.6	0.5	0.8	0.5	0.5	0.5		1.4	4.8	5.8	3.2
	Fibrinogen	306	261	380		287	510		330	363	250	321	307	317	178			266	285	360	393
	Leukocytosis	5.3	8.1	7	5.9	8.2	9		24.5	8.9	5.9	7.9	8.4	3.9	7.6	5.8		5.6	7.61	10.2	3.1
	Thrombocytopenia (platelets)	335	171	239	278	349	387		180	288	300	312	377	233	252	307		234	339	211	283
		Colors: White – mild cases; Yellow – moderate cases; Orange – severe case.
	Table 18 - Twenty days after treatment with only laboratory aspects including AHB Score
		1	2	3	4	5	6	7	8	9	10	11	12	13	14	15	16	17	18	19	20
		00101	00102	00103	00105	00106	00107	00108	00109	00110	00111	00112	00113	00114	00115	00116	00117	00301	00302	00303	00304
	Creatine kinase (CK)	0	0	1	0	0	0		0	0	0	1	0	0	0	0		0	0	0	0
	Alanine amino transferase (ALT)	0	0	0	0	0	0		0	0	0		0	0	0	0		0	0	0	0
	Creatinine	0	0	0	0	0	0		0	0	0	0	0	0	0	0		0	0	0	0
	C-reactive protein (CRP)	0	0	1	0	0	0		0	0	0	0	0	0	0	0		1	1	1	1
	Fibrinogen	0	0	0		0	1		0	0	0	0	0	0	0			0	0	0	0
	Leukocytosis	0	0	0	0	0	0		0	0	0	0	0	0	0	0		0	0	0	0
	Thrombocytopenia (platelets)	0	0	0	0	0	0		0	0	0	0	0	0	0	0		0	0	0	0
	SCORE AHB	0	0	2	0	0	1	0	0	0	0	1	0	0	0	0	0	1	1	1	1
		Colors: White – mild cases; Yellow – moderate cases; Orange – severe case.

## Sheet: 30 days after discharge
	Table 18 - Tirthy days after treatment with clinical and laboratory aspects
		1	2	3	4	5	6	7	8	9	10	11	12	13	14	15	16	17	18	19	20
		00101	00102	00103	00105	00106	00107	00108	00109	00110	00111	00112	00113	00114	00115	00116	00117	00301	00302	00303	00304
	Hemodynamic disorders	0	0	0	0	0	0	0	0	0	0	0	0	0	0	0	0	0	0	0	0
	Respiratory disorders	0	0	0	0	0	0	0	0	0	0	0	0	0	0	0	0	0	0	0	0
	Neurological disorders	0	0	0	0	0	0	0	0	0	0	0	0	0	0	0	0	0	0	0	0
	Acute kidney failure	0	0	0	0	0	0	0	0	0	0	0	0	0	0	0	0	0	0	0	0
	Creatine kinase (CK)	59	160	516	113	42	90		87	109	59		78	89	106	76	161	78	50	219	44
	Alanine amino transferase (ALT)	27	27	31	88	15	20		20	36	20		36	28	23	22	42	15	10	13	22
	Creatinine	0.7	0.9	1.1	0.9	0.7	0.7		0.8	0.6	0.6		0.8	1	0.9	0.9	1.1	0.97	1.06	0.91	0.78
	C-reactive protein (CRP)	0.5	0.5	1.1	0.5	1.1	0.9		0.5		0.5		0.8	0.5	0.5	0.5	0.5	5.4	9.4	1.6	3.3
	Fibrinogen	346	206	376	326	286	484		330	275	225		325	276	225			246	423	337	442
	Leukocytosis	7.2	6.8	6.1	5.9	7	8.3		9.5	8.9	7.5		8.5	7.4	6.1	7.9	7.9	8.7	13.5	7.37	3.7
	Thrombocytopenia (platelets)	377	164	292	319	351	394		180	226	327		360	215	178	349	211	320	274	226	220
		Colors: White – mild cases; Yellow – moderate cases; Orange – severe case.
	Table 19 - Tirthy days after treatment with clinical and laboratory aspects including AHB Score
		1	2	3	4	5	6	7	8	9	10	11	12	13	14	15	16	17	18	19	20
		00101	00102	00103	00105	00106	00107	00108	00109	00110	00111	00112	00113	00114	00115	00116	00117	00301	00302	00303	00304
	Hemodynamic disorders	0	0	0	0	0	0	0	0	0	0	0	0	0	0	0	0	0	0	0	0
	Respiratory disorders	0	0	0	0	0	0	0	0	0	0	0	0	0	0	0	0	0	0	0	0
	Neurological disorders	0	0	0	0	0	0	0	0	0	0	0	0	0	0	0	0	0	0	0	0
	Acute kidney failure	0	0	0	0	0	0	0	0	0	0	0	0	0	0	0	0	0	0	0	0
	Creatine kinase (CK)	0	0	1	0	0	0		0	0	0		0	0	0	0	0	0	0	0	0
	Alanine amino transferase (ALT)	0	0	0	1	0	0		0	0	0		0	0	0	0	0	0	0	0	0
	Creatinine	0	0	0	0	0	0		0	0	0		0	0	0	0	0	0	0	0	0
	C-reactive protein (CRP)	0	0	1	0	1	0		0		0		0	0	0	0	0	1	1	1	1
	Fibrinogen	0	0	0	0	0	1		0	0	0		0	0	0			0	1	0	1
	Leukocytosis	0	0	0	0	0	0		0	0	0		0	0	0	0	0	0	1	0	0
	Thrombocytopenia (platelets)	0	0	0	0	0	0		0	0	0		0	0	0	0	0	0	0	0	0
	SCORE AHB	0	0	2	1	1	1	0	0	0	0	0	0	0	0	0	0	1	3	1	2
		Colors: White – mild cases; Yellow – moderate cases; Orange – severe case.
	Table 20 - Tirthy days after treatment with only laboratory aspects
		1	2	3	4	5	6	7	8	9	10	11	12	13	14	15	16	17	18	19	20
		00101	00102	00103	00105	00106	00107	00108	00109	00110	00111	00112	00113	00114	00115	00116	00117	00301	00302	00303	00304
	Creatine kinase (CK)	59	160	516	113	42	90		87	109	59		78	89	106	76	161	78	50	219	44
	Alanine amino transferase (ALT)	27	27	31	88	15	20		20	36	20		36	28	23	22	42	15	10	13	22
	Creatinine	0.7	0.9	1.1	0.9	0.7	0.7		0.8	0.6	0.6		0.8	1	0.9	0.9	1.1	0.97	1.06	0.91	0.78
	C-reactive protein (CRP)	0.5	0.5	1.1	0.5	1.1	0.9		0.5		0.5		0.8	0.5	0.5	0.5	0.5	5.4	9.4	1.6	3.3
	Fibrinogen	346	206	376	326	286	484		330	275	225		325	276	225			246	423	337	442
	Leukocytosis	7.2	6.8	6.1	5.9	7	8.3		9.5	8.9	7.5		8.5	7.4	6.1	7.9	7.9	8.7	13.5	7.37	3.7
	Thrombocytopenia (platelets)	377	164	292	319	351	394		180	226	327		360	215	178	349	211	320	274	226	220
		Colors: White – mild cases; Yellow – moderate cases; Orange – severe case.
	Table 21 - Tirthy days after treatment with only laboratory aspects including AHB Score
		1	2	3	4	5	6	7	8	9	10	11	12	13	14	15	16	17	18	19	20
		00101	00102	00103	00105	00106	00107	00108	00109	00110	00111	00112	00113	00114	00115	00116	00117	00301	00302	00303	00304
	Creatine kinase (CK)	0	0	1	0	0	0		0	0	0		0	0	0	0	0	0	0	0	0
	Alanine amino transferase (ALT)	0	0	0	1	0	0		0	0	0		0	0	0	0	0	0	0	0	0
	Creatinine	0	0	0	0	0	0		0	0	0		0	0	0	0	0	0	0	0	0
	C-reactive protein (CRP)	0	0	1	0	1	0		0		0		0	0	0	0	0	1	1	1	1
	Fibrinogen	0	0	0	0	0	1		0	0	0		0	0	0			0	1	0	1
	Leukocytosis	0	0	0	0	0	0		0	0	0		0	0	0	0	0	0	1	0	0
	Thrombocytopenia (platelets)	0	0	0	0	0	0		0	0	0		0	0	0	0	0	0	0	0	0
	SCORE AHB	0	0	2	1	1	1	0	0	0	0	0	0	0	0	0	0	1	3	1	2
		Colors: White – mild cases; Yellow – moderate cases; Orange – severe case.
